# Supplementary material for: The combination of gas-phase fluorophore technology and automation to enable high-throughput analysis of plant respiration
Source: PubMed Central journal article supplement (PMC5361846; doi:10.1186/s13007-017-0169-3), 2017-03-21
Supplement: 13007_2017_169_MOESM1_ESM.pdf [file 13007_2017_169_MOESM1_ESM.pdf]

## Supporting Information

**Table S1.** Technical reproducibility of fluorophore instrument in measuring the chemical oxidation of cysteine across three separate experiments and for 30 sample tubes during each experiment.

|                                                     | Experiment 1 | Experiment 2 | Experiment 3 |
|-----------------------------------------------------|--------------|--------------|--------------|
| O <sub>2</sub> consumption (% air h <sup>-1</sup> ) | 1.87         | 2.00         | 1.65         |
| Standard deviation (% air h <sup>-1</sup> )         | 0.10         | 0.16         | 0.18         |
| Coefficient of variation (%)                        | 5.55         | 8.22         | 10.67        |

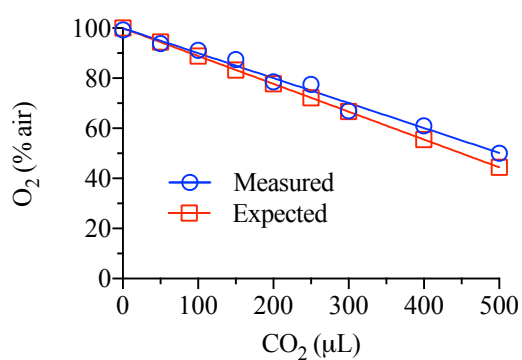

**Figure S1.** The measured (blue open circles) and expected (red open squares) depletion of O<sub>2</sub> (given as a % of O<sub>2</sub> relative to air) through replacement of air with known volumes of pure CO<sub>2</sub> gas in a 900 μL sample tube. The measured depletion values were linear ( $r^2=0.99$ ) and had a slope of -0.0996 similar to the expected depletion rate of -0.1111.

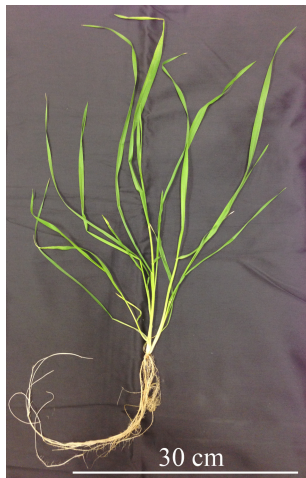

**Figure S2.** A representative 46-day-old wheat plant harvested for whole-plant respiration analysis by dissection into individual leaves, stem and roots and placement in sample tubes and analysis of O<sub>2</sub> consumption on the Q2 oxygen sensor.

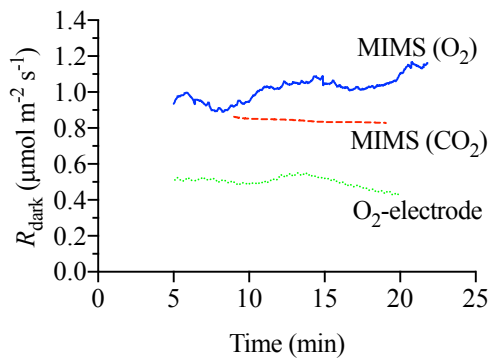

**Figure S3.** Derived respiration rates in the dark ( $R_{\text{dark}}$ ) calculated from a 5 min running slope measured between 5 and 20 min from experiment initiation measured by membrane inlet mass spectrometry (MIMS) on an O<sub>2</sub> consumption (blue solid line), CO<sub>2</sub> evolution (red dashed line), or by O<sub>2</sub>-electrodes (dotted green line) after placing wheat leaf disks in the measuring cuvette.
